# Supplementary material for: Rosmarinic acid alleviates ethanol-induced lipid accumulation by repressing fatty acid biosynthesis
Source: Royal Society of Chemistry journal article supplement (doi:10.1039/c9fo02357g), 2020-01-01
Supplement: c9fo02357g2.pdf [file c9fo02357g2.pdf]

**Fig. S1** Heatmap visualization of abundances from detected metabolites. Metabolite abundances are color-coded in a blue-yellow gradient.

**Fig. S2** Heatmap visualization of abundances from altered metabolites. The abundances are color-coded from blue to yellow.

**Fig. S3** The alteration of metabolites mapped to enriched pathways. Red-, white- and green-filled colors indicate an increase, no change and a decrease of metabolite levels, respectively.

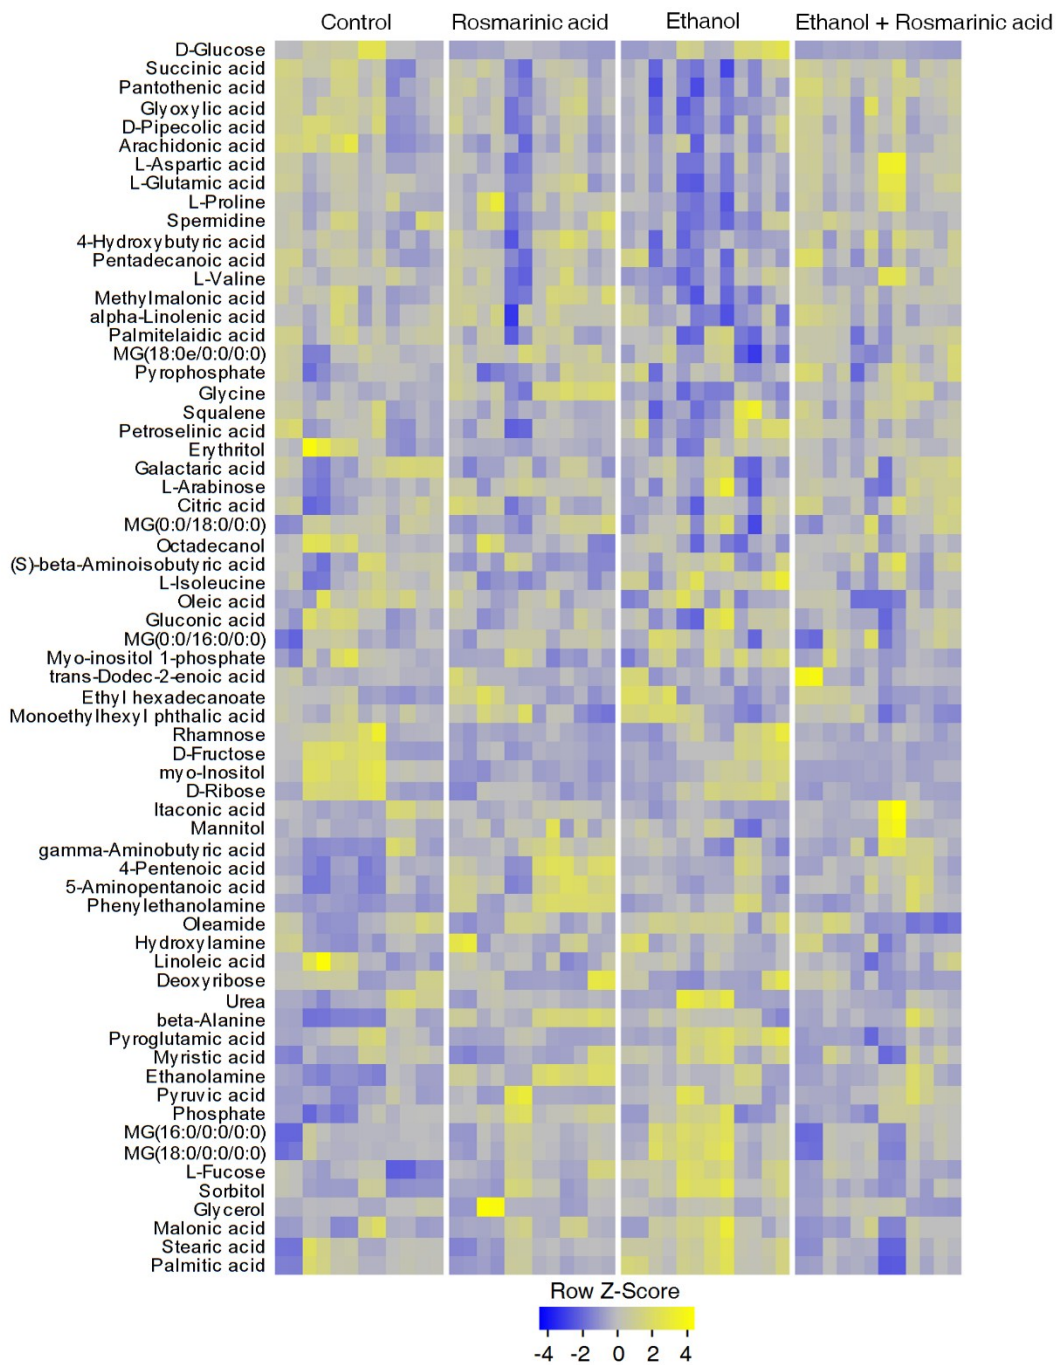

Fig. S1

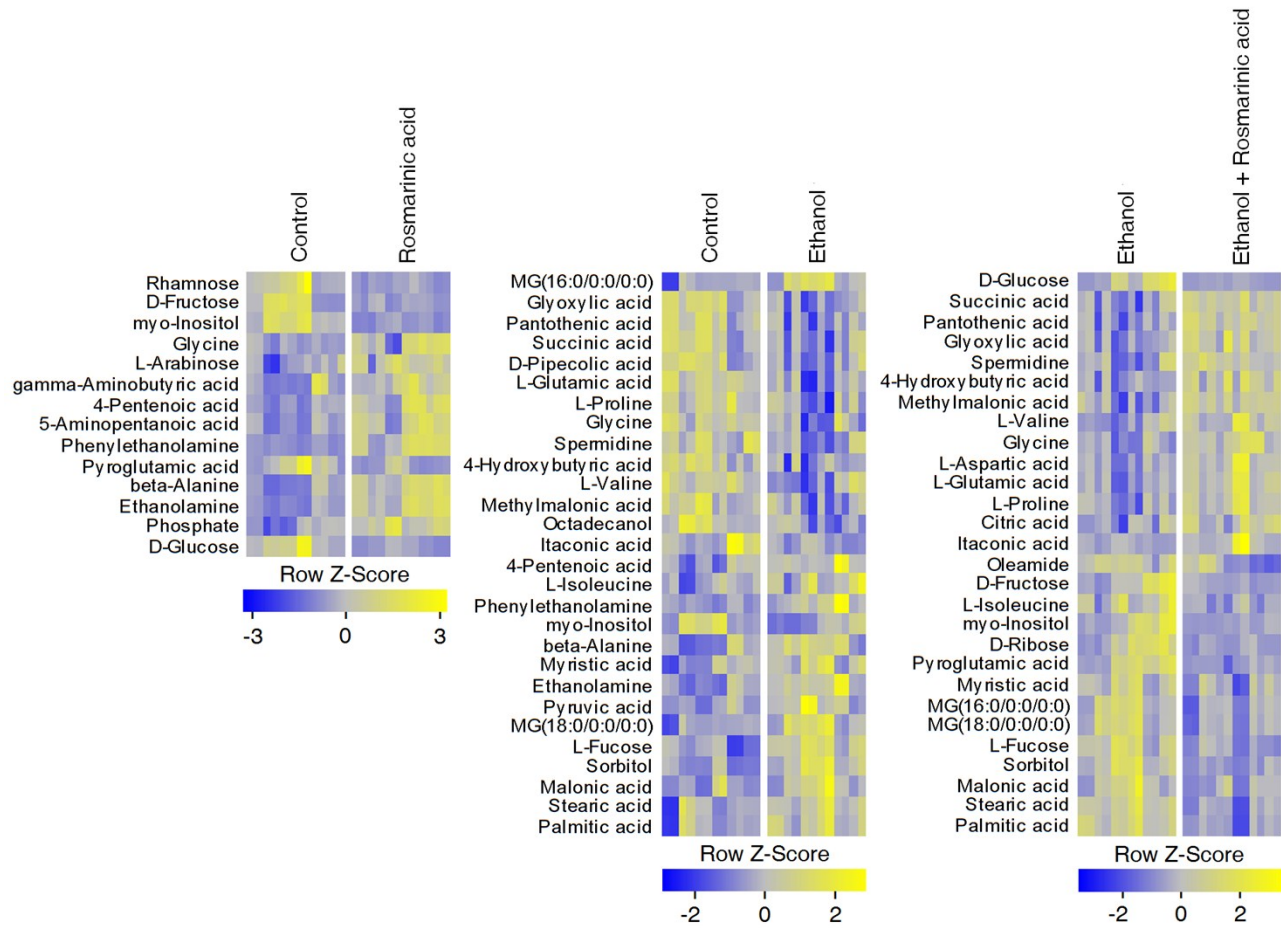

**Fig. S2**

**A**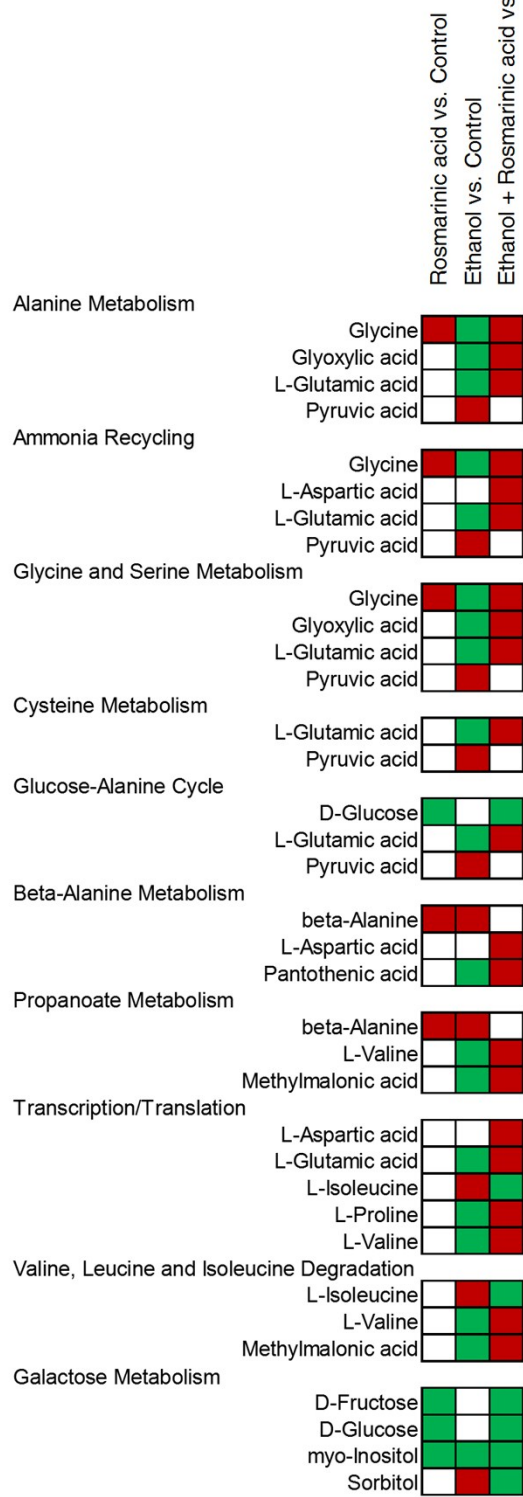**B**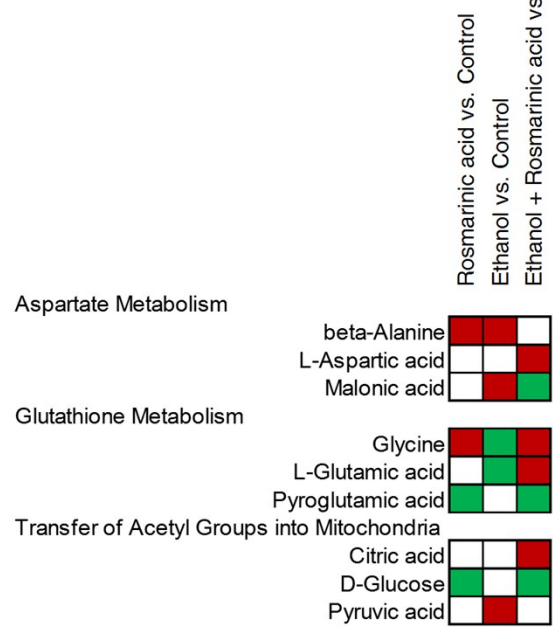**Fig. S3**
