# Supplementary figures and images for: Rosmarinic acid alleviates ethanol-induced lipid accumulation by repressing fatty acid biosynthesis
Source: Royal Society of Chemistry journal article supplement (doi:10.1039/c9fo02357g), 2020-01-01

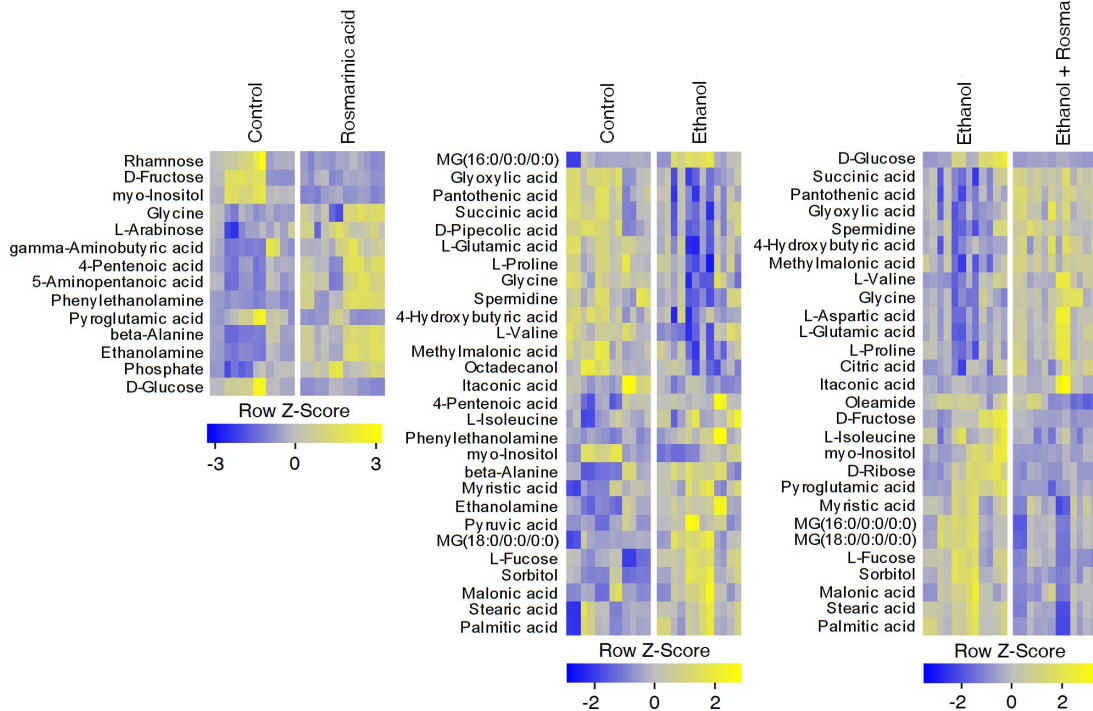

Supplement: c9fo02357g4.pdf [file c9fo02357g4.pdf]
